# Supplementary material
Source: Springer Nature journal article supplement (https://www.springerprofessional.de/resource/supplementary/13174_2012_1_MOESM7_ESM.pdf/10784722)
Supplement: MOESM7 [file 10784722]

```

testCreateHandle {
    msiPyInitialize;
    msiLocalPython9(*pyScript, "createHandle", "noRecursionTest", *uri, *suffix, *username,
    *pass, "{ 'URL': 'http://test.example.org/loc1', 'CHECKSUM': 'abcdef' }", *res2);
    msiPyFinalize;
}
INPUT *pyScript="/srv/irods/current/epicclient.py",*uri="https://epic.sara.nl/epic1/9210",
*suffix="testHandle", *username="user",*pass="pass"
OUTPUT null

```

(a) Example of an iRODS rule that uses our createHandle python function to register a "testHandle" PID in the EPIC PID service.

```

acPostProcForPut{
  ON($objPath like "/zone/monitored/*") {
    ... details omitted...
    msiSplitPath($objPath,*collection,*fileName);
    msiPyInitialize;
    msiLocalPython9(*pyScript, "createHandle", "noRecursionTest", *uri, *fileName, *username,
    *pass, "{ 'URL': 'http://myirods.eudat.org/safereplication/*fileName',
    'CHECKSUM': 'abcdef' }", *res2);
    msiPyFinalize;
  }
}

```

(b) Example of one possible integration of the EPIC calls into the data management policies of iRODS.
